# Supplementary material
Source: PubMed Central journal article supplement (PMC2866793)
Supplement: NIHMS174600-supplement-01.pdf [file NIHMS174600-supplement-01.pdf]

Subject Number: \_\_\_\_\_

Date: \_\_\_\_\_

## EYE-QoI

Please check the box that best matches your answer in the last month.

1. How hard is it for you to see the colors (red/yellow/green) on a stoplight?

- 1 - Not hard  
 2 - A little hard  
 3 - Hard

- 4 - Very hard  
 5 - Cannot do  
 6 - Does not apply

2. How hard is it for you to see the blackboard if you are NOT sitting in the front row or first seat in class?

- 1 - Not hard  
 2 - A little hard  
 3 - Hard

- 4 - Very hard  
 5 - Cannot do  
 6 - Does not apply

3. How hard is it for you to see the words in your school books if your book is NOT in front of you and close to your face?

- 1 - Not hard  
 2 - A little hard  
 3 - Hard

- 4 - Very hard  
 5 - Cannot do  
 6 - Does not apply

4. How hard is it for you to see the numbers in your school books when you are doing math problems if your book is NOT in front of you and close to your face?

- 1 - Not hard  
 2 - A little hard  
 3 - Hard

- 4 - Very hard  
 5 - Cannot do  
 6 - Does not apply

5. How hard is it for you to see the difference between a one-dollar bill and a five-dollar bill?

- 1 - Not hard  
 2 - A little hard  
 3 - Hard

- 4 - Very hard  
 5 - Cannot do  
 6 - Does not apply

Subject Number: \_\_\_\_\_

Date: \_\_\_\_\_

6. How hard is it for you to see the steps so that you don't trip up or fall down the stairs?

- |                                            |                                             |
|--------------------------------------------|---------------------------------------------|
| <input type="checkbox"/> 1 - Not hard      | <input type="checkbox"/> 4 - Very hard      |
| <input type="checkbox"/> 2 - A little hard | <input type="checkbox"/> 5 - Cannot do      |
| <input type="checkbox"/> 3 - Hard          | <input type="checkbox"/> 6 - Does not apply |

7. How hard is it for you to see the television screen if you are not sitting close to it?

- |                                            |                                             |
|--------------------------------------------|---------------------------------------------|
| <input type="checkbox"/> 1 - Not hard      | <input type="checkbox"/> 4 - Very hard      |
| <input type="checkbox"/> 2 - A little hard | <input type="checkbox"/> 5 - Cannot do      |
| <input type="checkbox"/> 3 - Hard          | <input type="checkbox"/> 6 - Does not apply |

8. How hard is it for you to see where to walk through a doorway without bumping into the wall?

- |                                            |                                             |
|--------------------------------------------|---------------------------------------------|
| <input type="checkbox"/> 1 - Not hard      | <input type="checkbox"/> 4 - Very hard      |
| <input type="checkbox"/> 2 - A little hard | <input type="checkbox"/> 5 - Cannot do      |
| <input type="checkbox"/> 3 - Hard          | <input type="checkbox"/> 6 - Does not apply |

9. How hard is it for you to see the circles on a computer answer sheet so that you can fill them in when you are taking a standardized test?

- |                                            |                                             |
|--------------------------------------------|---------------------------------------------|
| <input type="checkbox"/> 1 - Not hard      | <input type="checkbox"/> 4 - Very hard      |
| <input type="checkbox"/> 2 - A little hard | <input type="checkbox"/> 5 - Cannot do      |
| <input type="checkbox"/> 3 - Hard          | <input type="checkbox"/> 6 - Does not apply |

10. How hard is it for you to see the food on your plate so that you can put it on your fork?

- |                                            |                                             |
|--------------------------------------------|---------------------------------------------|
| <input type="checkbox"/> 1 - Not hard      | <input type="checkbox"/> 4 - Very hard      |
| <input type="checkbox"/> 2 - A little hard | <input type="checkbox"/> 5 - Cannot do      |
| <input type="checkbox"/> 3 - Hard          | <input type="checkbox"/> 6 - Does not apply |

11. How hard is it for you to see how much to fill a glass with a drink and not let it spill over?

- |                                            |                                             |
|--------------------------------------------|---------------------------------------------|
| <input type="checkbox"/> 1 - Not hard      | <input type="checkbox"/> 4 - Very hard      |
| <input type="checkbox"/> 2 - A little hard | <input type="checkbox"/> 5 - Cannot do      |
| <input type="checkbox"/> 3 - Hard          | <input type="checkbox"/> 6 - Does not apply |

Subject Number: \_\_\_\_\_

Date: \_\_\_\_\_

12. How hard is it for you to see a baseball coming towards you when it is thrown at you?

1 - Not hard

2 - A little hard

3 - Hard

4 - Very hard

5 - Cannot do

6 - Does not apply

13. How hard is it for you to see a basketball coming towards you when someone throws it at you?

1 - Not hard

2 - A little hard

3 - Hard

4 - Very hard

5 - Cannot do

6 - Does not apply

14. Are there other things you think are hard to do because of your vision?

1 - Yes

2 - No

What things? \_\_\_\_\_

\_\_\_\_\_

---
